# Supplementary material for: Baseline and post-treatment biomarkers of resistance to anti-PD-1 therapy in acral and mucosal melanoma: an observational study
Source: PubMed Central journal article supplement — J Immunother Cancer. 2022 Jul 6;10(7):e004879. doi: 10.1136/jitc-2022-004879 (PMC9260847; doi:10.1136/jitc-2022-004879), 2022-07-06
Supplement: jitc-2022-004879supp002.pdf [file jitc-2022-004879supp002.pdf]

**SUPPLEMENTARY TABLES AND FIGURE**

**Supplementary Table 1. Patient demographic and clinical characteristics <sup>A</sup>**

| Characteristic               | All patients<br>(N = 124) | Non-<br>progressors<br>(N = 14) | Resistant<br>(N = 110) | Original resistance<br>definitions |                     | SITC resistance definitions |                     |
|------------------------------|---------------------------|---------------------------------|------------------------|------------------------------------|---------------------|-----------------------------|---------------------|
|                              |                           |                                 |                        | Primary<br>(N=61)                  | Secondary<br>(N=49) | Primary<br>(N=76)           | Secondary<br>(N=32) |
| <b>Age</b>                   |                           |                                 |                        |                                    |                     |                             |                     |
| Mean (SD)                    | 59.5 (12.4)               | 58.2 (12.7)                     | 59.7 (12.4)            | 60.1 (12.13)                       | 59.3 (12.93)        | 60.1 (12.82)                | 59.5 (11.56)        |
| <b>Gender (binary)</b>       |                           |                                 |                        |                                    |                     |                             |                     |
| Female                       | 57 (46.0)                 | 5 (35.7)                        | 52 (47.3)              | 27 (44.3)                          | 25 (51.0)           | 39 (51.3)                   | 11 (34.4)           |
| Male                         | 67 (54.0)                 | 9 (64.3)                        | 58 (52.7)              | 34 (55.7)                          | 24 (49.0)           | 37 (48.7)                   | 21 (65.6)           |
| <b>Histology</b>             |                           |                                 |                        |                                    |                     |                             |                     |
| Acral                        | 76 (61.3)                 | 10 (71.4)                       | 66 (60.0)              | 35 (57.4)                          | 31 (63.3)           | 46 (60.5)                   | 19 (59.4)           |
| Mucosal                      | 44 (35.5)                 | 4 (28.6)                        | 40 (36.4)              | 24 (39.3)                          | 16 (32.7)           | 27 (35.5)                   | 12 (37.5)           |
| Unknown primary <sup>B</sup> | 4 (3.2)                   | 0 (0.0)                         | 4 (3.6)                | 2 (3.3)                            | 2 (4.1)             | 3 (3.9)                     | 1 (3.1)             |
| <b>BRAF status</b>           |                           |                                 |                        |                                    |                     |                             |                     |
| Patients with data           | 122                       | 14                              | 108                    | 60                                 | 48                  | 75                          | 31                  |
| V600                         | 15 (12.3)                 | 4 (28.6)                        | 11 (10.2)              | 6 (10.0)                           | 5 (10.4)            | 7 (9.3)                     | 4 (12.9)            |
| WT                           | 105 (86.1)                | 10 (71.4)                       | 95 (88.0)              | 54 (90.0)                          | 41 (85.4)           | 67 (89.3)                   | 26 (83.9)           |
| Other                        | 2 (1.6)                   | 0 (0.0)                         | 2 (1.9)                | 0 (0.0)                            | 2 (4.2)             | 1 (1.3)                     | 1 (3.2)             |
| <b>KIT status</b>            |                           |                                 |                        |                                    |                     |                             |                     |
| Patients with data           | 104                       | 12                              | 92                     | 49                                 | 43                  | 62                          | 28                  |
| Mutant                       | 5 (4.8)                   | 0 (0.0)                         | 5 (5.4)                | 0 (0.0)                            | 5 (11.6)            | 3 (4.8)                     | 2 (7.1)             |

| Characteristic                                                | All patients<br>(N = 124) | Non-<br>progressors<br>(N = 14) | Resistant<br>(N = 110) | Original resistance<br>definitions |                     | SITC resistance definitions |                     |
|---------------------------------------------------------------|---------------------------|---------------------------------|------------------------|------------------------------------|---------------------|-----------------------------|---------------------|
|                                                               |                           |                                 |                        | Primary<br>(N=61)                  | Secondary<br>(N=49) | Primary<br>(N=76)           | Secondary<br>(N=32) |
| WT                                                            | 99 (95.2)                 | 12 (100)                        | 87 (94.6)              | 49 (100.0)                         | 38 (88.4)           | 59 (95.2)                   | 26 (92.9)           |
| <i>NRAS</i> status                                            |                           |                                 |                        |                                    |                     |                             |                     |
| Patients with data                                            | 104                       | 11                              | 93                     | 49                                 | 44                  | 61                          | 30                  |
| Mutant                                                        | 15 (14.4)                 | 1 (9.1)                         | 14 (15.1)              | 9 (18.4)                           | 5 (11.4)            | 10 (16.4)                   | 4 (13.3)            |
| WT                                                            | 89 (85.6)                 | 10 (90.9)                       | 79 (84.9)              | 40 (81.6)                          | 39 (88.6)           | 51 (83.6)                   | 26 (86.7)           |
| M stage at baseline biopsy <sup>c</sup>                       |                           |                                 |                        |                                    |                     |                             |                     |
| M0                                                            | 6 (4.8)                   | 3 (21.4)                        | 3 (2.7)                | 2 (3.3)                            | 1 (2.0)             | 2 (2.6)                     | 1 (3.1)             |
| M1a                                                           | 44 (35.5)                 | 2 (14.3)                        | 42 (38.2)              | 27 (44.3)                          | 15 (30.6)           | 34 (44.7)                   | 7 (21.9)            |
| M1b                                                           | 9 (7.3)                   | 1 (7.1)                         | 8 (7.3)                | 3 (4.9)                            | 5 (10.2)            | 3 (3.9)                     | 4 (12.5)            |
| M1c                                                           | 65 (52.4)                 | 8 (57.1)                        | 57 (51.8)              | 29 (47.5)                          | 28 (57.1)           | 37 (48.7)                   | 20 (62.5)           |
| Metastasis at baseline biopsy                                 |                           |                                 |                        |                                    |                     |                             |                     |
| Brain                                                         | 6 (4.8)                   | 1 (7.1)                         | 5 (4.5)                | 4 (6.6)                            | 1 (2.0)             | 5 (6.6)                     | 0 (0.0)             |
| Liver                                                         | 18 (14.5)                 | 1 (7.1)                         | 17 (15.5)              | 11 (18.0)                          | 6 (12.2)            | 14 (18.4)                   | 3 (9.4)             |
| ECOG performance status                                       |                           |                                 |                        |                                    |                     |                             |                     |
| 1                                                             | 123 (99.2)                | 14 (100)                        | 109 (99.1)             | 60 (98.4)                          | 49 (100.0)          | 75 (98.7)                   | 32 (100.0)          |
| 2                                                             | 1 (0.8)                   | 0 (0.0)                         | 1 (0.9)                | 1 (1.6)                            | 0 (0.0)             | 1 (1.3)                     | 0 (0.0)             |
| Serum lactase dehydrogenase status at initiation of anti-PD-1 |                           |                                 |                        |                                    |                     |                             |                     |

| Characteristic                           | All patients<br>(N = 124) | Non-<br>progressors<br>(N = 14) | Resistant<br>(N = 110) | Original resistance<br>definitions |                     | SITC resistance definitions |                     |
|------------------------------------------|---------------------------|---------------------------------|------------------------|------------------------------------|---------------------|-----------------------------|---------------------|
|                                          |                           |                                 |                        | Primary<br>(N=61)                  | Secondary<br>(N=49) | Primary<br>(N=76)           | Secondary<br>(N=32) |
| therapy                                  |                           |                                 |                        |                                    |                     |                             |                     |
| Elevated                                 | 16 (12.9)                 | 1 (7.1)                         | 15 (13.6)              | 11 (18.0)                          | 4 (8.2)             | 12 (15.8)                   | 3 (9.4)             |
| Normal                                   | 93 (75.0)                 | 12 (85.7)                       | 81 (73.6)              | 42 (68.9)                          | 39 (79.6)           | 54 (71.1)                   | 26 (81.3)           |
| Unknown                                  | 15 (12.1)                 | 1 (7.1)                         | 14 (12.7)              | 8 (13.1)                           | 6 (12.2)            | 10 (13.2)                   | 3 (9.4)             |
| Neutrophil to lymphocyte<br>ratio        |                           |                                 |                        |                                    |                     |                             |                     |
| Mean (SD)                                | 2.1 (0.1)                 | 1.8 (0.5)                       | 2.1 (1.0)              | 2.3 (1.0)                          | 2.0 (1.0)           | 2.14 (0.981)                | 2.13 (1.119)        |
| Median (range)                           | 1.9 (0.7–6.2)             | 1.6 (1.2–3.0)                   | 1.9 (0.7–6.2)          | 2.0 (0.9–5.4)                      | 1.8 (0.7–6.2)       | 1.87 (0.7–<br>5.4)          | 1.90 (0.9–<br>6.2)  |
| Rounds of previous<br>systemic therapies |                           |                                 |                        |                                    |                     |                             |                     |
| 0                                        | 108 (87.1)                | 14 (100)                        | 94 (85.5)              | 51 (83.6)                          | 43 (87.8)           | 63 (82.9)                   | 29 (90.6)           |
| 1                                        | 15 (12.1)                 | 0 (0.0)                         | 15 (13.6)              | 9 (14.8)                           | 6 (12.2)            | 12 (15.8)                   | 3 (9.4)             |
| 2                                        | 1 (0.8)                   | 0 (0.0)                         | 1 (0.9)                | 1 (1.6)                            | 0 (0.0)             | 1 (1.3)                     | 0 (0.0)             |
| Type of previous systemic<br>therapy     |                           |                                 |                        |                                    |                     |                             |                     |
| Patients with data                       | 16                        | 0                               | 16                     | 10                                 | 6                   | 13                          | 3                   |
| BRAF and/or<br>MEK/MAP2K inhibitor       | 2 (12.5)                  | NA                              | 2 (12.5)               | 2 (20.0)                           | 0 (0.0)             | 2 (15.4)                    | 0 (0.0)             |
| CTLA-4 inhibitor                         | 1 (6.3)                   | NA                              | 1 (6.3)                | 1 (10.0)                           | 0 (0.0)             | 1 (7.7)                     | 0 (0.0)             |
| Dacarbazine or CVD                       | 12 (75.0)                 | NA                              | 12 (75.0)              | 7 (70.0)                           | 5 (83.3)            | 9 (69.2)                    | 3 (100.0)           |

| Characteristic                | All patients<br>(N = 124) | Non-<br>progressors<br>(N = 14) | Resistant<br>(N = 110) | Original resistance<br>definitions |                     | SITC resistance definitions |                     |
|-------------------------------|---------------------------|---------------------------------|------------------------|------------------------------------|---------------------|-----------------------------|---------------------|
|                               |                           |                                 |                        | Primary<br>(N=61)                  | Secondary<br>(N=49) | Primary<br>(N=76)           | Secondary<br>(N=32) |
| Paclitaxel + carboplatin      | 1 (6.3)                   | NA                              | 1 (6.3)                | 0 (0.0)                            | 1 (16.7)            | 1 (7.7)                     | 0 (0.0)             |
| Site of baseline biopsy       |                           |                                 |                        |                                    |                     |                             |                     |
| Patients with data            | 124                       | 14                              | 110                    | 61                                 | 49                  | 76                          | 32                  |
| Skin                          | 56 (45.2)                 | 2 (14.3)                        | 54 (49.1)              | 28 (45.9)                          | 26 (53.1)           | 36 (47.4)                   | 16 (50.0)           |
| Lymph node                    | 24 (19.4)                 | 5 (35.7)                        | 19 (17.3)              | 10 (16.4)                          | 9 (18.4)            | 14 (18.4)                   | 5 (15.6)            |
| Mucosal surface               | 21 (16.9)                 | 3 (21.4)                        | 18 (16.4)              | 12 (19.7)                          | 6 (12.2)            | 13 (17.1)                   | 5 (15.6)            |
| Other                         | 23 (18.6)                 | 4 (28.6)                        | 19 (17.3)              | 11 (18.0)                          | 8 (16.3)            | 13 (17.1)                   | 6 (18.8)            |
| Site of Post-treatment biopsy |                           |                                 |                        |                                    |                     |                             |                     |
| Patients with data            | NA                        | NA                              | 90                     | 53                                 | 37                  | 68                          | 21                  |
| Skin                          | NA                        | NA                              | 30 (33.3)              | 15 (28.3)                          | 15 (40.5)           | 20 (29.4)                   | 9 (42.9)            |
| Lymph node                    | NA                        | NA                              | 19 (21.1)              | 12 (22.6)                          | 7 (18.9)            | 16 (23.5)                   | 3 (14.3)            |
| Mucosal surface               | NA                        | NA                              | 10 (11.1)              | 5 (9.4)                            | 5 (13.5)            | 7 (10.3)                    | 3 (14.3)            |
| Other                         | NA                        | NA                              | 31 (34.4)              | 21 (39.6)                          | 10 (27.0)           | 25 (36.8)                   | 6 (28.6)            |

CVD, cisplatin, vinblastine and dacarbazine; ECOG, Eastern Cooperative Oncology Group; NA, not applicable; SD, standard deviation; SITC, Society for Immunotherapy of Cancer; WT, wild-type.

<sup>A</sup> All values given as *n* (%) unless otherwise stated.

<sup>B</sup> Only those unknown primary tumors with the clinical appearance of mucosal melanoma were included in the study.

<sup>C</sup> M0, no distant metastases; M1a, non-visceral metastases to skin, soft tissue including muscles, and/or nonregional lymph nodes; M1b, distant metastases to lung; M1c, all other visceral metastases and any distant metastases with elevated lactate dehydrogenase levels.

**Supplementary Table 2. Patient treatment and clinical outcomes <sup>A</sup>**

|                                                  | All patients<br>(N = 124) | Non-<br>progressors<br>(N = 14) | Resistant<br>(N = 110) | Original resistance<br>definitions |                  | SITC resistance definitions |                  |
|--------------------------------------------------|---------------------------|---------------------------------|------------------------|------------------------------------|------------------|-----------------------------|------------------|
|                                                  |                           |                                 |                        | Primary                            | Secondary        | Primary                     | Secondary        |
| <b>Type of anti-PD-1 treatment</b>               |                           |                                 |                        |                                    |                  |                             |                  |
| Nivolumab                                        | 20 (16.1)                 | 4 (28.6)                        | 16 (14.5)              | 6 (9.8)                            | 10 (20.4)        | 8 (10.5)                    | 8 (25.0)         |
| Pembrolizumab                                    | 104 (83.9)                | 10 (71.4)                       | 94 (85.5)              | 55 (90.2)                          | 39 (79.6)        | 68 (89.5)                   | 24 (75.0)        |
| <b>Number of cycles received</b>                 |                           |                                 |                        |                                    |                  |                             |                  |
| Median (range)                                   | 10 (2–67)                 | 33 (14–67)                      | 8 (2–64)               | 5.0 (2–27)                         | 19.0 (5–64)      | 6.0 (2–27)                  | 23.0 (10–64)     |
| <b>Duration of anti-PD-1 treatment (months)</b>  |                           |                                 |                        |                                    |                  |                             |                  |
| Median (range)                                   | 6.3 (1.3–45.0)            | 23.2 (9.4–38.4) <sup>B</sup>    | 5.4 (1.3–45.0)         | 2.79 (1.3–18.4)                    | 12.45 (3.7–45.0) | 3.45 (1.3–18.4)             | 13.86 (6.7–45.0) |
| <b>Duration of response (months)<sup>C</sup></b> |                           |                                 |                        |                                    |                  |                             |                  |
| Patients with data                               | 94                        | 14                              | 80                     | 31                                 | 49               | 46                          | 32               |
| Median (range)                                   | 6.0 (0.0–44.5)            | 27.2 (15.6–44.5) <sup>B</sup>   | 4.7 (0.0–40.7)         | 1.64 (0.0–2.9)                     | 7.87 (3.1–40.7)  | 1.93 (0.0–5.6)              | 11.25 (5.9–40.7) |
| <b>Best overall response</b>                     |                           |                                 |                        |                                    |                  |                             |                  |
| Complete response                                | 11 (8.9)                  | 7 (50.0)                        | 4 (3.6)                | 1 (1.6)                            | 3 (6.1)          | 1 (1.3)                     | 2 (6.3)          |
| Partial response                                 | 35 (28.2)                 | 7 (50.0)                        | 28 (25.5)              | 6 (9.8)                            | 22 (44.9)        | 8 (10.5)                    | 19 (59.4)        |
| Stable disease                                   | 48 (38.7)                 | 0 (0.0)                         | 48 (43.6)              | 24 (39.3)                          | 24 (49.0)        | 37 (48.7)                   | 11 (34.4)        |

|                                | All patients<br>(N = 124) | Non-<br>progressors<br>(N = 14) | Resistant<br>(N = 110) | Original resistance<br>definitions |           | SITC resistance definitions |           |
|--------------------------------|---------------------------|---------------------------------|------------------------|------------------------------------|-----------|-----------------------------|-----------|
|                                |                           |                                 |                        | Primary                            | Secondary | Primary                     | Secondary |
| Progressive disease            | 30 (24.2)                 | 0 (0.0)                         | 30 (27.3)              | 30 (49.2)                          | 0 (0.0)   | 30 (39.5)                   | 0 (0.0)   |
| Vital status at last follow-up |                           |                                 |                        |                                    |           |                             |           |
| Alive                          | 64 (51.6)                 | 14 (100)                        | 50 (45.5)              | 22 (36.1)                          | 28 (57.1) | 27 (35.5)                   | 21 (65.6) |
| Dead                           | 60 (48.4)                 | 0 (0.0)                         | 60 (54.5)              | 39 (63.9)                          | 21 (42.9) | 49 (64.5)                   | 11 (34.4) |

SD, standard deviation; SITC, Society for Immunotherapy of Cancer.

<sup>A</sup> All values given as *n* (%) unless otherwise stated.

<sup>B</sup> Date of last follow-up was used to calculate duration of therapy and response for 9 non-responders whose treatment was ongoing at the end of the study period.

<sup>C</sup> Duration of response is reported for patients with a best overall response of complete response, partial response, and stable disease. Patients with BOR of CR, PR, or SD <90 days (original definition) and <180 days (SITC definition) before progression are considered primary resistance. Patients with a BOR of ≥90 days (original definition) and ≥180 days (SITC definition) before progression are considered secondary resistance.

**Supplementary Table 3. Patient characteristics by acral and mucosal melanoma <sup>A</sup>**

| Characteristic                            | Acral (N = 76) | Mucosal/Unknown Primary (N = 48) |
|-------------------------------------------|----------------|----------------------------------|
| <b>Age</b>                                |                |                                  |
| Mean (SD)                                 | 58.9 (12.38)   | 60.5 (12.6)                      |
| <b>Gender</b>                             |                |                                  |
| Female                                    | 34 (44.7)      | 23 (47.9)                        |
| Male                                      | 42 (55.3)      | 25 (52.1)                        |
| <b>BRAF status</b>                        |                |                                  |
| Subjects with data                        | 74             | 48                               |
| V600                                      | 11 (14.9)      | 4 (8.3)                          |
| WT                                        | 62 (83.8)      | 43 (89.6)                        |
| Other                                     | 1 (1.4)        | 1 (2.1)                          |
| <b>M stage at biopsy <sup>B</sup></b>     |                |                                  |
| M0                                        | 1 (1.3)        | 5 (10.4)                         |
| M1a                                       | 32 (42.1)      | 12 (25.0)                        |
| M1b                                       | 5 (6.6)        | 4 (8.3)                          |
| M1c                                       | 38 (50.0)      | 27 (56.3)                        |
| <b>ECOG performance status</b>            |                |                                  |
| 1                                         | 76 (100.0)     | 44 (97.9)                        |
| 2                                         | 0 (0.0)        | 1 (2.1)                          |
| <b>Lines of previous systemic therapy</b> |                |                                  |
| 0                                         | 64 (84.2)      | 4 (90.9)                         |
| 1                                         | 11 (14.5)      | 4 (9.1)                          |
| 2                                         | 1 (1.3)        | 0 (0.0)                          |
| <b>Type of previous systemic therapy</b>  |                |                                  |
| Subjects with data                        | 12             | 4                                |
| BRAF and/or MEK inhibitor                 | 1 (8.3)        | 1 (25.0)                         |
| CTLA-4 inhibitor                          | 0 (0.0)        | 1 (25.0)                         |
| Dacarbazine                               | 10 (83.3)      | 2 (50.0)                         |
| Paclitaxel + carboplatin                  | 1 (8.3)        | 0 (0.0)                          |
| <b>Type of anti-PD-1 treatment</b>        |                |                                  |
| Nivolumab                                 | 12 (15.8)      | 8 (16.7)                         |



---

|                                          |                  |                  |
|------------------------------------------|------------------|------------------|
| Pembrolizumab                            | 64 (84.2)        | 40 (83.3)        |
| Cycles received                          |                  |                  |
| Median (range)                           | 10 (2, 67)       | 11.5 (2, 50)     |
| Duration of anti-PD-1 treatment (months) |                  |                  |
| Median (range)                           | 6.29 (1.4, 45.0) | 6.67 (1.3, 26.2) |

---

ECOG, Eastern Cooperative Oncology Group; SD, standard deviation; WT, wild-type.

<sup>A</sup> All values given as *n* (%) unless otherwise stated.

<sup>B</sup> M0, no distant metastases; M1a, non-visceral metastases to skin, soft tissue including muscles, and/or nonregional lymph nodes; M1b, distant metastases to lung; M1c, all other visceral metastases and any distant metastases with elevated lactase dehydrogenase levels.

**Supplementary Table 4. Baseline and post-treatment comparisons of mRNA signature expression levels in the non-progressor and resistant groups<sup>A</sup>**

| mRNA signature<br>(number of genes in<br>consensus gene set) | Baseline<br>expression,<br>non-<br>progressors<br>versus resistant | Post-treatment<br>change from<br>baseline,<br>resistant | Post-treatment change from<br>baseline, primary versus<br>secondary resistance |                      |
|--------------------------------------------------------------|--------------------------------------------------------------------|---------------------------------------------------------|--------------------------------------------------------------------------------|----------------------|
|                                                              | AUROC (95% CI)                                                     | Effect size (95%<br>CI)                                 | Original study<br>definition                                                   | SITC definition      |
| GEP (18)                                                     | 0.78<br>(0.62, 0.94)                                               | 0.34<br>(-0.05, 0.72)                                   | 0.53<br>(0.37, 0.68)                                                           | 0.51<br>(0.33, 0.68) |
| Angiogenesis (16)                                            | 0.62<br>(0.46, 0.78)                                               | 0.07<br>(-0.31, 0.45)                                   | 0.48<br>(0.32, 0.64)                                                           | 0.59<br>(0.41, 0.77) |
| Glycolysis (30)                                              | 0.59<br>(0.37, 0.81)                                               | -0.12<br>(-0.50, 0.26)                                  | 0.51<br>(0.35, 0.67)                                                           | 0.53<br>(0.35, 0.72) |
| Hypoxia (20)                                                 | 0.61<br>(0.39, 0.83)                                               | -0.07<br>(-0.45, 0.31)                                  | 0.51<br>(0.35, 0.67)                                                           | 0.47<br>(0.29, 0.65) |
| gMDSC (43)                                                   | 0.51<br>(0.31, 0.70)                                               | -0.03<br>(-0.41, 0.35)                                  | 0.63<br>(0.48, 0.79)                                                           | 0.60<br>(0.42, 0.78) |
| mMDSC (218)                                                  | 0.61<br>(0.44, 0.77)                                               | 0.23<br>(-0.15, 0.61)                                   | 0.60<br>(0.45, 0.75)                                                           | 0.61<br>(0.46, 0.76) |
| MYC (32)                                                     | 0.56<br>(0.35, 0.77)                                               | 0.23<br>(-0.15, 0.61)                                   | 0.61<br>(0.46, 0.77)                                                           | 0.60<br>(0.42, 0.77) |
| Proliferation (227)                                          | 0.55<br>(0.34, 0.77)                                               | 0.03<br>(-0.35, 0.41)                                   | 0.61<br>(0.46, 0.76)                                                           | 0.55<br>(0.36, 0.75) |
| RAS (11)                                                     | 0.49<br>(0.27, 0.71)                                               | -0.09<br>(-0.46, 0.29)                                  | 0.57<br>(0.42, 0.73)                                                           | 0.67<br>(0.51, 0.84) |
| Stroma/EMT/ <i>TGFB1</i><br>(51)                             | 0.63<br>(0.45, 0.81)                                               | -0.12<br>(-0.50, 0.26)                                  | 0.50<br>(0.34, 0.66)                                                           | 0.50<br>(0.27, 0.63) |
| WNT (13)                                                     | 0.47<br>(0.30, 0.64)                                               | -0.42<br>(-0.81, -0.04)                                 | 0.57<br>(0.42, 0.73)                                                           | 0.76<br>(0.62, 0.90) |
| IFNA1 (3)                                                    | 0.48<br>(0.32, 0.65)                                               | -0.50<br>(-0.89, -0.11)                                 | 0.57<br>(0.42, 0.73)                                                           | 0.54<br>(0.36, 0.71) |
| Cytokine (12)                                                | 0.58<br>(0.38, 0.77)                                               | -0.01<br>(-0.38, 0.37)                                  | 0.57<br>(0.41, 0.73)                                                           | 0.62<br>(0.47, 0.77) |

AUROC, area under the receiver operating characteristic; CI, confidence interval; EMT, epithelial-to-mesenchymal transition; GEP, 18-gene T cell-inflamed gene expression profile (Tcell<sub>inf</sub>GEP); gMDSC, granulocytic myeloid-derived suppressor cells; mMDSC, monocytic myeloid-derived suppressor cells; SITC, Society for Immunotherapy of Cancer.

<sup>A</sup> All mRNA signatures other than GEP were adjusted for GEP values.

**Supplementary Table 5. Baseline and post-treatment comparisons of infiltrating immune cell densities in the non-progressor and resistant groups <sup>A</sup>**

| Cell type          | Baseline expression, non-progressors versus resistant | Post-treatment change from baseline, primary versus secondary resistance |                      |
|--------------------|-------------------------------------------------------|--------------------------------------------------------------------------|----------------------|
|                    |                                                       | Original study definition                                                | SITC definition      |
| CD8 <sup>+</sup>   | 0.78<br>(0.65, 0.90)                                  | 0.53<br>(0.39, 0.67)                                                     | 0.58<br>(0.43, 0.73) |
| CD11c <sup>+</sup> | 0.70<br>(0.54, 0.87)                                  | 0.60<br>(0.46, 0.75)                                                     | 0.62<br>(0.45, 0.78) |
| FOXP3 <sup>+</sup> | 0.73<br>(0.54, 0.87)                                  | 0.58<br>(0.44, 0.71)                                                     | 0.69<br>(0.55, 0.83) |

SITC, Society for Immunotherapy of Cancer.

<sup>A</sup> All values given as area under the receiver operating characteristic (95% confidence interval)

**Supplementary Figure 1. Percent PD-L1 MEL score  $\geq 2$  at baseline**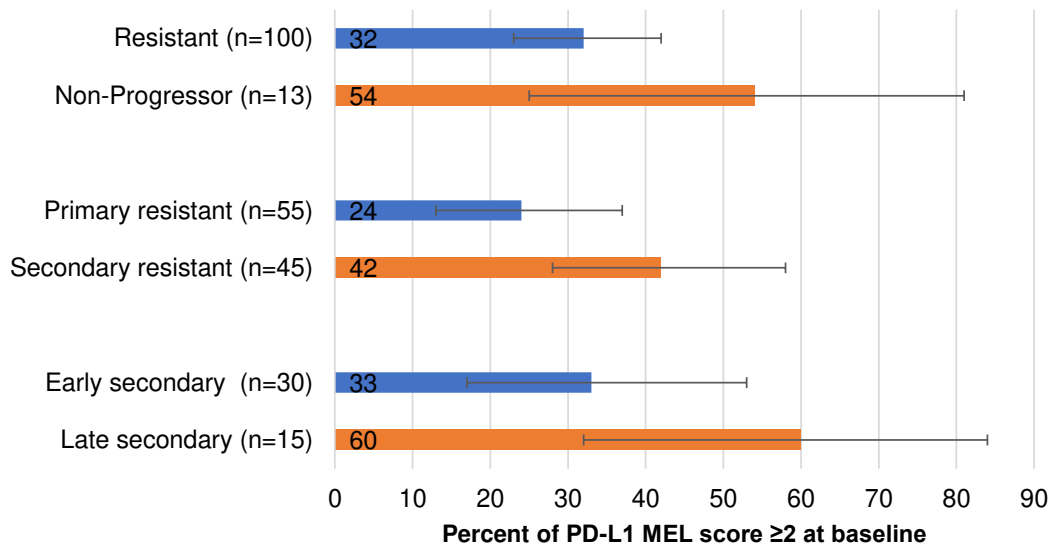

\*Based on the original study definitions for resistance.
